# Supplementary material
Source: HighWire-hosted journal article supplement (https://jnm.snmjournals.org/highwire/filestream/99563/field_highwire_adjunct_files/0/245837_Supplemental_Data.pdf)
Supplement: 245837_Supplemental_Data.pdf [file 245837_Supplemental_Data.pdf]

### Supplemental Method 1

<Calculation of Radioactivity Concentration for in Vitro Stability>

Radioactivity concentration was set assuming the maximum serum concentration in human

$$740 \text{ MBq/m}^2 \times 1.89 \text{ m}^2 / 2836.0 \text{ mL} = 0.5 \text{ MBq/mL}$$

Putative radiation dose: 740 MBq/m<sup>2</sup>

$$\text{Human body surface area: } 1.89 \text{ m}^2 = \text{Height}^{0.725} \times \text{Weight}^{0.425} \times 0.007184 \text{ (1)}$$

Height: 176 cm (2)

Weight: 73 kg (2)

$$\text{Serum volume: } 2836.0 \text{ mL} = \text{Blood volume} \times (1 - \text{Hematocrit}) \times \text{Weight}$$

Blood volume: 73.3 mL/kg (3)

Hematocrit: 0.47

### Supplemental Method 2

<Calculation for Dosage Based on Body Surface Area Conversion; Monkey mg/kg to mg/m<sup>2</sup>>

To convert dose in mg/kg to dose in mg/m<sup>2</sup> multiply factor (K<sub>m</sub>) of monkey: 12 kg/m<sup>2</sup> (4)

$$0.04 \text{ (mg/kg)} \times 12 \text{ (kg/m}^2\text{)} = 0.48 \text{ (mg/m}^2\text{)}$$

$$0.4 \text{ (mg/kg)} \times 12 \text{ (kg/m}^2\text{)} = 4.8 \text{ (mg/m}^2\text{)}$$

$$4 \text{ (mg/kg)} \times 12 \text{ (kg/m}^2\text{)} = 48 \text{ (mg/m}^2\text{)}$$

The mg/head of mouse corresponding to the above dosage based on body surface area was calculated.

To convert dose in mg/kg to dose in mg/m<sup>2</sup> multiply factor (K<sub>m</sub>) of mouse: 3 kg/m<sup>2</sup> (4)

Mouse body weight: 0.025 kg/head

$$0.48 \text{ (mg/m}^2\text{)} / 3 \text{ (kg/m}^2\text{)} \times 0.025 \text{ (kg/head)} = 0.004 \text{ (mg/head)}$$

$$4.8 \text{ (mg/m}^2\text{)} / 3 \text{ (kg/m}^2\text{)} \times 0.025 \text{ (kg/head)} = 0.04 \text{ (mg/head)}$$

$$48 \text{ (mg/m}^2\text{)} / 3 \text{ (kg/m}^2\text{)} \times 0.025 \text{ (kg/head)} = 0.4 \text{ (mg/head)}$$

### Supplemental Method 3

<Calculation for Dosage Based on Body Surface Area Conversion; Mouse MBq/head to MBq/m<sup>2</sup>>

The therapeutic radiation dose (MBq/head) of mouse was converted to the dosage based on body surface area

To convert dose in mg/kg to dose in mg/m<sup>2</sup> multiply factor (K<sub>m</sub>) of mouse: 3 kg/m<sup>2</sup> (4)

The K<sub>m</sub> for mg/kg was applied to MBq/kg.

Mouse body weight: 0.025 kg/head

$$7.4 \text{ (MBq/head)} / 0.025 \text{ (kg/head)} \times 3 \text{ (kg/m}^2\text{)} = 888 \text{ (MBq/m}^2\text{)}$$

$$\text{Human body surface area: } 1.89 \text{ m}^2 = \text{Height}^{0.725} \times \text{Weight}^{0.425} \times 0.007184 \text{ (1)}$$

Height: 176 cm (2)

Weight: 73 kg (2)

$$888 \text{ (MBq/m}^2\text{)} \times 1.89 \text{ (m}^2\text{)} = 1,678 \text{ (MBq)}$$

#### Supplemental Method 4

< Calculation for Dosage Based on Bodyweight Conversion; mg/m<sup>2</sup> to Human mg/kg >

To convert dose in mg/kg to dose in mg/m<sup>2</sup> multiply factor (K<sub>m</sub>) of human: 37 kg/m<sup>2</sup> (4)

$$4.8 \text{ (mg/m}^2\text{)} / (37 \text{ kg/m}^2\text{)} = 0.13 \text{ (mg/kg)}$$

#### Supplemental Method 5

<Calculation of Maximum Radiation Dose>

The upper limits of the absorbed dose were set at 3,000 mGy and 20,000 mGy for the red marrow and any other organ, respectively (5).

0.04 mg/kg:

$$\text{Hat wall: } 20,000 \text{ mGy} / 2.31 \text{ mGy/MBq} = 8,658 \text{ MBq}$$

$$\text{Liver: } 20,000 \text{ mGy} / 2.56 \text{ mGy/MBq} = 7,813 \text{ MBq}$$

$$\text{Lungs: } 20,000 \text{ mGy} / 1.21 \text{ mGy/MBq} = 16,529 \text{ MBq}$$

$$\text{Red marrow: } 3,000 \text{ mGy} / 0.661 \text{ mGy/MBq} = 4,539 \text{ MBq}$$

$$\text{Osteogenic cells: } 20,000 \text{ mGy} / 0.680 \text{ mGy/MBq} = 29,412 \text{ MBq}$$

$$\text{Spleen: } 20,000 \text{ mGy} / 12.0 \text{ mGy/MBq} = 1,667 \text{ MBq}$$

0.4 mg/kg:

$$\text{Hat wall: } 20,000 \text{ mGy} / 2.54 \text{ mGy/MBq} = 7,874 \text{ MBq}$$

$$\text{Liver: } 20,000 \text{ mGy} / 2.47 \text{ mGy/MBq} = 8,097 \text{ MBq}$$

$$\text{Lungs: } 20,000 \text{ mGy} / 1.19 \text{ mGy/MBq} = 16,807 \text{ MBq}$$

$$\text{Red marrow: } 3,000 \text{ mGy} / 0.786 \text{ mGy/MBq} = 3,817 \text{ MBq}$$

$$\text{Osteogenic cells: } 20,000 \text{ mGy} / 0.817 \text{ mGy/MBq} = 24,480 \text{ MBq}$$

$$\text{Spleen: } 20,000 \text{ mGy} / 6.93 \text{ mGy/MBq} = 2,886 \text{ MBq}$$

4 mg/kg:

Hat wall:  $20,000 \text{ mGy} / 3.28 \text{ mGy/MBq} = 6,098 \text{ MBq}$

Liver:  $20,000 \text{ mGy} / 2.55 \text{ mGy/MBq} = 7,843 \text{ MBq}$

Lungs:  $20,000 \text{ mGy} / 1.82 \text{ mGy/MBq} = 10,989 \text{ MBq}$

Red marrow:  $3,000 \text{ mGy} / 0.885 \text{ mGy/MBq} = 3,390 \text{ MBq}$

Osteogenic cells:  $20,000 \text{ mGy} / 0.912 \text{ mGy/MBq} = 21,930 \text{ MBq}$

Spleen:  $20,000 \text{ mGy} / 2.77 \text{ mGy/MBq} = 7,220 \text{ MBq}$

**Supplemental Table 1**Tissue accumulation (%ID/g) of <sup>111</sup>In-FF-21101 in NCI-H1373 xenograft mouse model (mean ± SD)

|            | 5min           | 24h            | 48h            | 96h             | 192h           |
|------------|----------------|----------------|----------------|-----------------|----------------|
| Blood      | 42.758 ± 2.419 | 16.067 ± 1.808 | 13.465 ± 0.835 | 9.427 ± 1.673   | 3.309 ± 2.309  |
| Brain      | 0.759 ± 0.090  | 0.333 ± 0.034  | 0.287 ± 0.037  | 0.219 ± 0.024   | 0.096 ± 0.053  |
| Heart      | 5.383 ± 0.588  | 3.913 ± 0.666  | 3.636 ± 0.594  | 2.859 ± 0.239   | 1.172 ± 0.424  |
| Lungs      | 10.515 ± 2.618 | 6.145 ± 0.683  | 5.078 ± 0.772  | 4.216 ± 0.660   | 1.687 ± 0.944  |
| Liver      | 7.022 ± 0.488  | 4.828 ± 1.023  | 4.286 ± 0.438  | 3.843 ± 0.326   | 2.859 ± 0.771  |
| Spleen     | 6.277 ± 0.365  | 4.460 ± 0.678  | 4.447 ± 0.368  | 4.231 ± 0.328   | 3.113 ± 0.620  |
| Pancreas   | 1.302 ± 0.342  | 1.475 ± 0.200  | 1.271 ± 0.092  | 0.984 ± 0.131   | 0.471 ± 0.188  |
| Stomach    | 0.858 ± 0.101  | 1.648 ± 0.392  | 0.919 ± 0.266  | 0.970 ± 0.330   | 0.310 ± 0.103  |
| Small-Int. | 1.038 ± 0.177  | 1.861 ± 0.545  | 1.385 ± 0.327  | 1.086 ± 0.017   | 0.446 ± 0.157  |
| Cecum      | 0.322 ± 0.078  | 1.398 ± 0.458  | 0.808 ± 0.194  | 0.818 ± 0.142   | 0.375 ± 0.081  |
| Large-Int. | 1.186 ± 0.834  | 1.753 ± 0.400  | 1.153 ± 0.106  | 1.160 ± 0.130   | 0.453 ± 0.170  |
| Kidneys    | 7.623 ± 0.936  | 6.295 ± 0.970  | 4.977 ± 1.013  | 4.086 ± 0.184   | 2.172 ± 0.856  |
| Adrenals   | 5.200 ± 2.422  | 3.105 ± 0.889  | 2.530 ± 0.416  | 1.983 ± 0.551   | 1.018 ± 0.200  |
| Adipose    | 0.790 ± 0.243  | 1.508 ± 0.532  | 0.984 ± 0.078  | 0.639 ± 0.243   | 0.380 ± 0.162  |
| Testes     | 0.932 ± 0.186  | 2.521 ± 0.102  | 2.257 ± 0.356  | 2.242 ± 0.236   | 1.582 ± 0.377  |
| Bone       | 2.271 ± 0.141  | 1.747 ± 0.244  | 1.729 ± 0.039  | 1.525 ± 0.160   | 0.883 ± 0.400  |
| Muscle     | 0.455 ± 0.049  | 0.943 ± 0.129  | 1.020 ± 0.204  | 0.680 ± 0.083   | 0.290 ± 0.120  |
| Skin       | 0.927 ± 0.188  | 5.362 ± 0.732  | 4.214 ± 0.673  | 3.834 ± 0.376   | 1.846 ± 0.027  |
| Tumor      | 0.852 ± 0.036  | 34.914 ± 3.962 | 48.222 ± 5.198 | 46.398 ± 12.177 | 42.428 ± 19.80 |

**Supplemental Table 2**Tissue accumulation (%ID/g) of <sup>111</sup>In-FF-21101 in EBC-1 xenograft mouse model (mean ± SD)

|            | 5min           | 24h            | 48h            | 96h            | 192h           |
|------------|----------------|----------------|----------------|----------------|----------------|
| Blood      | 38.459 ± 2.307 | 12.936 ± 1.015 | 10.251 ± 1.022 | 5.464 ± 2.164  | 2.078 ± 0.884  |
| Brain      | 0.739 ± 0.123  | 0.588 ± 0.517  | 0.248 ± 0.040  | 0.131 ± 0.090  | 0.068 ± 0.021  |
| Heart      | 5.298 ± 1.222  | 2.763 ± 1.642  | 3.000 ± 0.680  | 1.743 ± 0.751  | 0.818 ± 0.292  |
| Lungs      | 9.670 ± 0.861  | 4.409 ± 0.657  | 3.888 ± 0.301  | 2.580 ± 0.856  | 1.223 ± 0.405  |
| Liver      | 6.831 ± 1.350  | 4.965 ± 1.152  | 3.563 ± 0.403  | 3.086 ± 0.983  | 2.471 ± 0.608  |
| Spleen     | 5.302 ± 1.129  | 3.715 ± 2.021  | 4.350 ± 0.848  | 3.101 ± 0.718  | 2.993 ± 0.937  |
| Pancreas   | 1.211 ± 0.193  | 1.597 ± 0.512  | 1.039 ± 0.081  | 0.679 ± 0.110  | 0.385 ± 0.127  |
| Stomach    | 0.793 ± 0.319  | 1.125 ± 0.359  | 0.750 ± 0.145  | 0.503 ± 0.169  | 0.260 ± 0.110  |
| Small-Int. | 1.006 ± 0.120  | 1.305 ± 0.090  | 1.141 ± 0.143  | 0.721 ± 0.179  | 0.331 ± 0.125  |
| Cecum      | 0.328 ± 0.158  | 0.989 ± 0.179  | 0.770 ± 0.019  | 0.708 ± 0.182  | 0.303 ± 0.068  |
| Large-Int. | 0.898 ± 0.459  | 1.213 ± 0.231  | 1.033 ± 0.067  | 0.754 ± 0.203  | 0.361 ± 0.078  |
| Kidneys    | 6.977 ± 0.209  | 5.480 ± 0.516  | 4.732 ± 0.569  | 3.347 ± 0.340  | 1.805 ± 0.429  |
| Adrenals   | 4.098 ± 0.896  | 2.121 ± 0.424  | 2.023 ± 0.332  | 1.112 ± 0.422  | 0.672 ± 0.128  |
| Adipose    | 0.868 ± 0.128  | 0.928 ± 0.269  | 0.638 ± 0.055  | 0.536 ± 0.175  | 0.262 ± 0.096  |
| Testes     | 0.737 ± 0.085  | 2.265 ± 0.236  | 1.687 ± 0.173  | 1.272 ± 0.567  | 1.162 ± 0.274  |
| Bone       | 1.913 ± 0.221  | 1.622 ± 0.376  | 1.479 ± 0.159  | 1.016 ± 0.169  | 0.677 ± 0.279  |
| Muscle     | 0.423 ± 0.049  | 0.924 ± 0.169  | 0.846 ± 0.094  | 0.808 ± 0.426  | 0.199 ± 0.039  |
| Skin       | 0.844 ± 0.371  | 5.467 ± 0.540  | 4.282 ± 0.194  | 2.473 ± 0.432  | 1.410 ± 0.268  |
| Tumor      | 1.061 ± 0.080  | 20.752 ± 1.407 | 28.936 ± 0.274 | 30.688 ± 0.650 | 22.026 ± 5.079 |

**Supplemental Table 3**Tissue accumulation (%ID/g) of <sup>111</sup>In-FF-21101 in A549 xenograft mouse model (mean ± SD)

|            | 5min           | 24h            | 48h            | 96h            | 192h          |
|------------|----------------|----------------|----------------|----------------|---------------|
| Blood      | 37.997 ± 1.216 | 17.084 ± 0.301 | 15.451 ± 0.781 | 16.027 ± 0.945 | 9.558 ± 2.434 |
| Brain      | 0.861 ± 0.068  | 0.400 ± 0.048  | 0.393 ± 0.052  | 0.370 ± 0.026  | 0.266 ± 0.056 |
| Heart      | 4.657 ± 1.285  | 4.657 ± 0.623  | 4.367 ± 0.824  | 4.158 ± 0.205  | 2.764 ± 0.758 |
| Lungs      | 11.610 ± 1.107 | 5.719 ± 0.597  | 6.211 ± 0.505  | 6.220 ± 0.467  | 4.399 ± 1.006 |
| Liver      | 6.750 ± 0.173  | 4.656 ± 0.447  | 5.769 ± 1.151  | 4.753 ± 1.354  | 4.768 ± 0.851 |
| Spleen     | 6.843 ± 0.369  | 6.080 ± 1.727  | 5.977 ± 1.318  | 7.219 ± 1.329  | 4.690 ± 1.029 |
| Pancreas   | 1.056 ± 0.156  | 1.188 ± 0.028  | 1.325 ± 0.085  | 1.559 ± 0.104  | 1.016 ± 0.267 |
| Stomach    | 0.657 ± 0.190  | 1.494 ± 0.211  | 1.150 ± 0.091  | 1.346 ± 0.049  | 0.993 ± 0.405 |
| Small-Int. | 0.912 ± 0.214  | 1.455 ± 0.042  | 1.665 ± 0.076  | 1.662 ± 0.242  | 1.161 ± 0.372 |
| Cecum      | 0.333 ± 0.021  | 0.936 ± 0.127  | 1.223 ± 0.177  | 1.152 ± 0.284  | 0.678 ± 0.124 |
| Large-Int. | 0.848 ± 0.171  | 1.192 ± 0.190  | 1.718 ± 0.084  | 1.513 ± 0.270  | 0.962 ± 0.182 |
| Kidneys    | 8.473 ± 1.551  | 4.474 ± 0.460  | 4.612 ± 0.410  | 4.733 ± 0.434  | 3.437 ± 1.010 |
| Adrenals   | 4.685 ± 3.032  | 3.028 ± 0.905  | 3.006 ± 0.166  | 2.903 ± 0.273  | 2.269 ± 0.807 |
| Adipose    | 0.849 ± 0.120  | 1.082 ± 0.112  | 1.317 ± 0.301  | 1.084 ± 0.257  | 0.832 ± 0.254 |
| Testes     | 0.760 ± 0.143  | 2.807 ± 0.167  | 2.921 ± 0.267  | 3.161 ± 0.369  | 2.673 ± 0.456 |
| Bone       | 2.575 ± 0.094  | 1.769 ± 0.246  | 1.922 ± 0.195  | 2.468 ± 0.225  | 1.610 ± 0.353 |
| Muscle     | 0.544 ± 0.004  | 1.098 ± 0.099  | 1.256 ± 0.059  | 1.154 ± 0.149  | 0.785 ± 0.218 |
| Skin       | 1.117 ± 0.294  | 4.468 ± 0.149  | 6.479 ± 1.081  | 5.416 ± 0.288  | 3.613 ± 0.418 |
| Tumor      | 1.030 ± 0.055  | 6.347 ± 0.679  | 7.482 ± 1.157  | 8.120 ± 0.198  | 5.200 ± 0.194 |

**Supplemental Table 4**Tissue accumulation (%ID/g) of <sup>111</sup>In-hIgG in NCI-H1373 xenograft mouse model (mean ± SD)

|            | 5min           | 24h            | 48h            | 96h            | 192h          |
|------------|----------------|----------------|----------------|----------------|---------------|
| Blood      | 42.704 ± 3.745 | 17.800 ± 0.904 | 18.417 ± 2.365 | 15.096 ± 1.340 | 9.585 ± 3.631 |
| Brain      | 0.852 ± 0.039  | 0.404 ± 0.027  | 0.391 ± 0.052  | 0.332 ± 0.040  | 0.214 ± 0.084 |
| Heart      | 6.262 ± 1.060  | 5.417 ± 1.196  | 4.637 ± 0.499  | 3.933 ± 0.443  | 2.698 ± 1.051 |
| Lungs      | 11.594 ± 1.236 | 7.140 ± 0.872  | 6.474 ± 0.897  | 6.605 ± 0.653  | 4.366 ± 1.289 |
| Liver      | 8.464 ± 2.029  | 5.630 ± 1.134  | 5.062 ± 0.515  | 5.430 ± 1.429  | 4.561 ± 0.553 |
| Spleen     | 8.735 ± 3.571  | 4.360 ± 0.327  | 4.984 ± 0.637  | 5.529 ± 1.240  | 4.041 ± 1.061 |
| Pancreas   | 1.644 ± 0.293  | 1.486 ± 0.320  | 1.491 ± 0.168  | 1.327 ± 0.016  | 1.110 ± 0.325 |
| Stomach    | 1.134 ± 0.124  | 1.472 ± 0.377  | 1.240 ± 0.313  | 1.234 ± 0.259  | 1.171 ± 0.038 |
| Small-Int. | 1.171 ± 0.346  | 1.833 ± 0.175  | 1.691 ± 0.201  | 1.645 ± 0.089  | 1.142 ± 0.315 |
| Cecum      | 0.313 ± 0.048  | 1.469 ± 0.276  | 1.141 ± 0.073  | 1.142 ± 0.124  | 0.692 ± 0.104 |
| Large-Int. | 0.967 ± 0.084  | 1.874 ± 0.297  | 1.642 ± 0.202  | 1.446 ± 0.056  | 1.088 ± 0.244 |
| Kidneys    | 8.076 ± 1.851  | 7.138 ± 1.302  | 6.184 ± 0.360  | 5.249 ± 0.196  | 3.588 ± 0.981 |
| Adrenals   | 6.136 ± 0.295  | 3.191 ± 0.172  | 3.042 ± 1.126  | 2.968 ± 0.120  | 2.765 ± 0.754 |
| Adipose    | 0.943 ± 0.048  | 1.020 ± 0.118  | 1.005 ± 0.333  | 1.113 ± 0.134  | 0.999 ± 0.470 |
| Testes     | 0.815 ± 0.179  | 2.941 ± 0.174  | 3.100 ± 0.066  | 3.079 ± 0.641  | 2.893 ± 0.478 |
| Bone       | 2.223 ± 0.491  | 1.832 ± 0.120  | 1.897 ± 0.446  | 1.887 ± 0.293  | 1.467 ± 0.632 |
| Muscle     | 0.373 ± 0.049  | 1.363 ± 0.263  | 1.261 ± 0.010  | 1.004 ± 0.186  | 0.760 ± 0.250 |
| Skin       | 1.230 ± 0.440  | 4.894 ± 0.212  | 4.480 ± 0.138  | 4.416 ± 0.380  | 3.709 ± 0.573 |
| Tumor      | 0.991 ± 0.075  | 8.847 ± 1.490  | 9.709 ± 0.023  | 8.365 ± 1.267  | 5.459 ± 0.335 |

**Supplemental Table 5**Tissue accumulation (%ID/g) of <sup>111</sup>In-hIgG in EBC-1 xenograft mouse model (mean ± SD)

|            | 5min           | 24h            | 48h            | 96h            | 192h           |
|------------|----------------|----------------|----------------|----------------|----------------|
| Blood      | 45.249 ± 4.358 | 18.859 ± 1.898 | 18.049 ± 0.773 | 16.221 ± 1.819 | 12.188 ± 1.859 |
| Brain      | 0.981 ± 0.109  | 0.430 ± 0.074  | 0.406 ± 0.036  | 0.351 ± 0.053  | 0.267 ± 0.020  |
| Heart      | 5.766 ± 1.820  | 4.849 ± 0.651  | 4.317 ± 0.558  | 2.270 ± 1.264  | 2.718 ± 0.398  |
| Lungs      | 11.832 ± 1.139 | 6.821 ± 0.332  | 6.875 ± 0.751  | 5.738 ± 0.533  | 5.152 ± 0.345  |
| Liver      | 8.860 ± 0.414  | 5.725 ± 0.064  | 4.950 ± 0.824  | 4.197 ± 0.314  | 4.417 ± 1.706  |
| Spleen     | 7.913 ± 1.741  | 4.539 ± 0.458  | 5.099 ± 0.771  | 5.803 ± 1.449  | 5.538 ± 0.692  |
| Pancreas   | 1.415 ± 0.329  | 1.407 ± 0.148  | 1.457 ± 0.271  | 1.383 ± 0.138  | 1.078 ± 0.163  |
| Stomach    | 0.764 ± 0.294  | 1.152 ± 0.414  | 1.096 ± 0.195  | 1.212 ± 0.241  | 1.003 ± 0.474  |
| Small-Int. | 1.041 ± 0.258  | 1.614 ± 0.293  | 1.451 ± 0.122  | 1.527 ± 0.094  | 1.157 ± 0.366  |
| Cecum      | 0.330 ± 0.079  | 1.144 ± 0.152  | 0.922 ± 0.008  | 0.932 ± 0.102  | 0.852 ± 0.016  |
| Large-Int. | 0.691 ± 0.111  | 1.545 ± 0.284  | 1.410 ± 0.207  | 1.271 ± 0.244  | 1.107 ± 0.137  |
| Kidneys    | 7.967 ± 2.198  | 6.680 ± 1.235  | 6.749 ± 0.837  | 5.871 ± 0.295  | 3.867 ± 0.508  |
| Adrenals   | 4.602 ± 0.674  | 3.293 ± 0.270  | 2.814 ± 0.284  | 2.881 ± 0.108  | 2.419 ± 0.642  |
| Adipose    | 0.832 ± 0.125  | 1.026 ± 0.103  | 0.910 ± 0.211  | 1.100 ± 0.005  | 0.906 ± 0.052  |
| Testes     | 0.754 ± 0.094  | 3.316 ± 0.346  | 3.175 ± 0.529  | 2.896 ± 0.327  | 2.783 ± 0.163  |
| Bone       | 2.499 ± 0.456  | 1.801 ± 0.290  | 1.923 ± 0.106  | 1.672 ± 0.072  | 1.847 ± 0.186  |
| Muscle     | 0.451 ± 0.067  | 1.201 ± 0.197  | 1.357 ± 0.304  | 1.171 ± 0.162  | 0.821 ± 0.058  |
| Skin       | 0.995 ± 0.196  | 5.604 ± 0.318  | 5.499 ± 0.635  | 5.032 ± 0.398  | 4.147 ± 0.113  |
| Tumor      | 1.425 ± 0.175  | 11.278 ± 1.999 | 10.946 ± 2.354 | 7.908 ± 1.090  | 5.501 ± 0.881  |



**Supplemental Table 6**Tissue accumulation (%ID/g) of <sup>111</sup>In-hIgG in A549 xenograft mouse model (mean ± SD)

|            | 5min           | 24h            | 48h            | 96h            | 192h           |
|------------|----------------|----------------|----------------|----------------|----------------|
| Blood      | 39.980 ± 3.194 | 18.477 ± 1.355 | 16.656 ± 3.269 | 15.947 ± 1.178 | 13.193 ± 0.974 |
| Brain      | 0.664 ± 0.051  | 0.347 ± 0.060  | 0.336 ± 0.070  | 0.347 ± 0.010  | 0.307 ± 0.077  |
| Heart      | 4.533 ± 1.500  | 4.655 ± 1.160  | 4.709 ± 1.323  | 3.915 ± 0.411  | 3.402 ± 0.414  |
| Lungs      | 9.031 ± 1.245  | 6.748 ± 1.736  | 5.724 ± 0.589  | 6.574 ± 0.827  | 5.975 ± 0.462  |
| Liver      | 7.949 ± 0.847  | 5.131 ± 0.664  | 5.044 ± 0.635  | 5.364 ± 1.674  | 4.189 ± 0.408  |
| Spleen     | 7.949 ± 2.641  | 6.312 ± 2.043  | 5.277 ± 1.136  | 5.837 ± 0.505  | 5.971 ± 0.829  |
| Pancreas   | 1.058 ± 0.109  | 1.359 ± 0.361  | 1.386 ± 0.140  | 1.269 ± 0.115  | 1.237 ± 0.195  |
| Stomach    | 0.796 ± 0.105  | 1.508 ± 0.702  | 1.109 ± 0.326  | 1.363 ± 0.214  | 0.647 ± 0.056  |
| Small-Int. | 0.881 ± 0.104  | 1.535 ± 0.134  | 1.668 ± 0.160  | 1.448 ± 0.180  | 1.165 ± 0.056  |
| Cecum      | 0.323 ± 0.044  | 1.118 ± 0.344  | 1.330 ± 0.334  | 0.957 ± 0.020  | 0.775 ± 0.059  |
| Large-Int. | 0.660 ± 0.051  | 1.499 ± 0.716  | 1.569 ± 0.338  | 1.486 ± 0.267  | 1.074 ± 0.054  |
| Kidneys    | 7.949 ± 0.890  | 6.975 ± 1.294  | 6.067 ± 1.112  | 5.313 ± 0.483  | 4.353 ± 0.557  |
| Adrenals   | 4.697 ± 0.615  | 2.631 ± 0.598  | 3.259 ± 0.406  | 3.028 ± 0.740  | 3.251 ± 0.706  |
| Adipose    | 1.108 ± 0.198  | 1.035 ± 0.138  | 1.774 ± 0.161  | 1.079 ± 0.113  | 1.084 ± 0.175  |
| Testes     | 0.800 ± 0.075  | 2.860 ± 0.500  | 2.747 ± 0.598  | 3.390 ± 0.729  | 3.131 ± 0.261  |
| Bone       | 2.317 ± 0.164  | 2.006 ± 0.477  | 1.995 ± 0.311  | 2.093 ± 0.271  | 1.951 ± 0.161  |
| Muscle     | 0.469 ± 0.053  | 1.064 ± 0.072  | 1.174 ± 0.245  | 1.023 ± 0.063  | 0.936 ± 0.092  |
| Skin       | 1.224 ± 0.608  | 5.455 ± 1.846  | 6.472 ± 2.032  | 5.288 ± 0.477  | 3.750 ± 0.449  |
| Tumor      | 0.816 ± 0.121  | 5.966 ± 1.924  | 5.302 ± 0.921  | 5.989 ± 0.732  | 5.351 ± 0.451  |

### Supplemental Figure 1

Relative body weight (%) of EBC-1 xenograft mouse model in treatment study

(□: PBS, ■: PPMX2032, ▲:  $^{90}\text{Y}$ -hIgG, ●:  $^{90}\text{Y}$ -FF-21101)

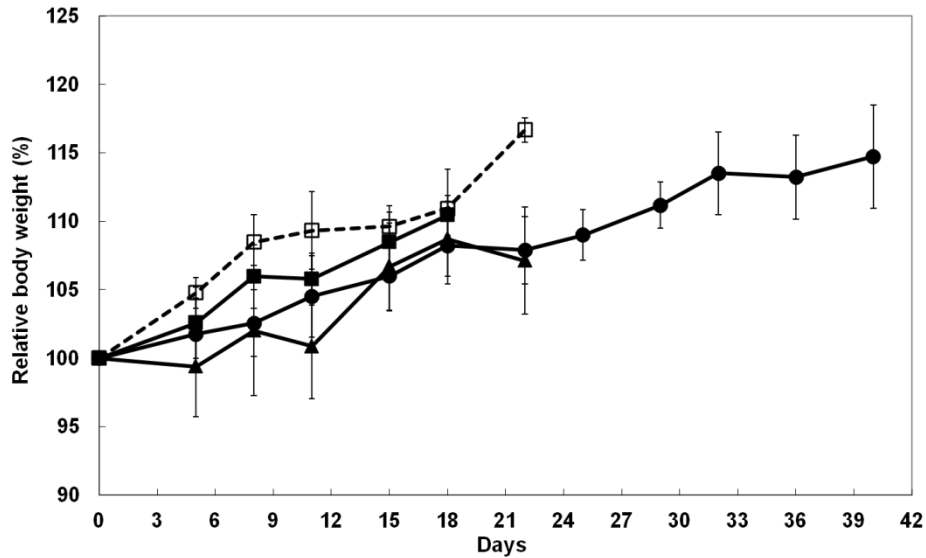

### Supplemental Figure 2

Relative body weight (%) of NCI-H1373 xenograft mouse model in treatment study

(□: PBS, ■: PPMX2032, ▲:  $^{90}\text{Y}$ -hIgG, ●:  $^{90}\text{Y}$ -FF-21101)

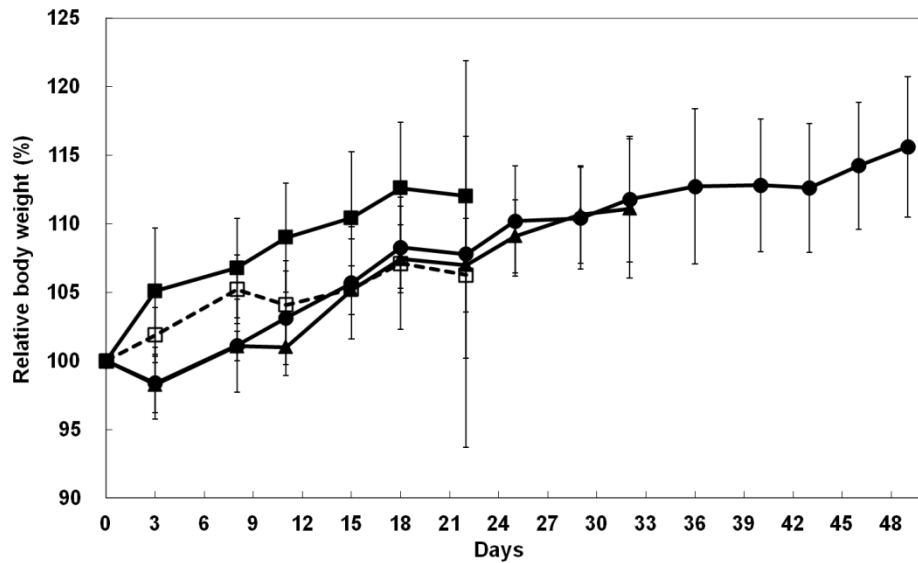

**Supplemental Figure 3**

Full-field-of-view image of planar imaging of cynomolgus monkey (0.04 mg/kg) 48 h after administration

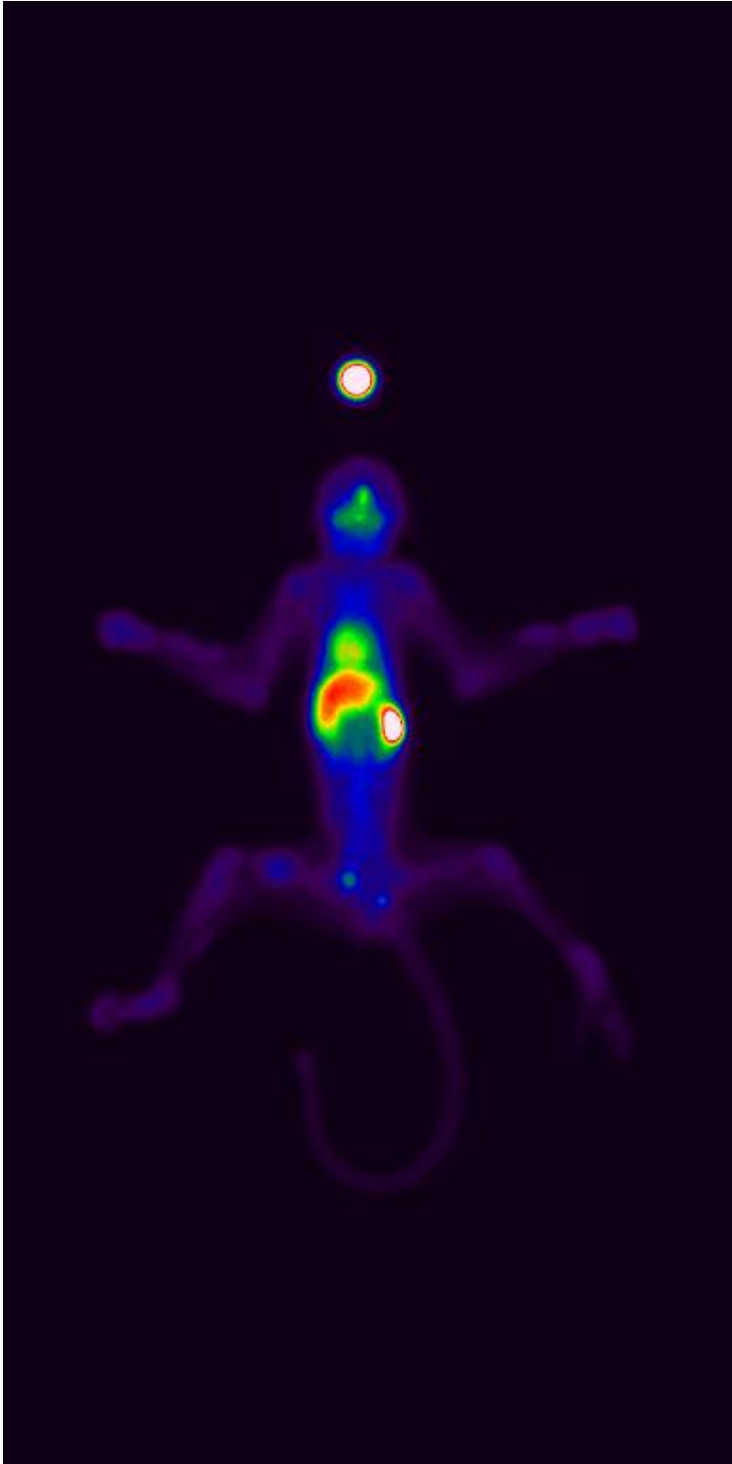

**Supplemental Figure 4**

Full-field-of-view image of planar imaging of cynomolgus monkey (0.4 mg/kg) 48 h after administration

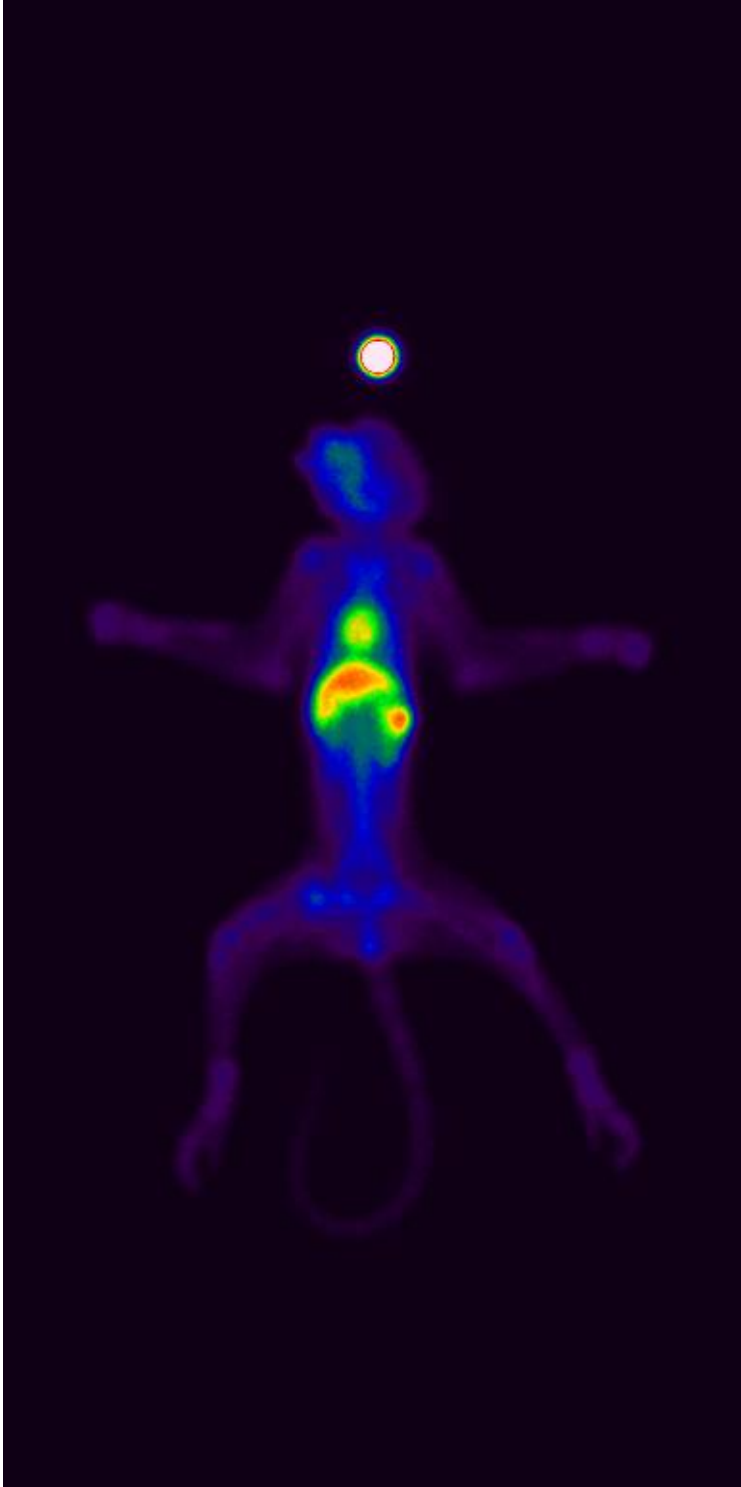

**Supplemental Figure 5**

Full-field-of-view image of planar imaging of cynomolgus monkey (4 mg/kg) 48 h after administration

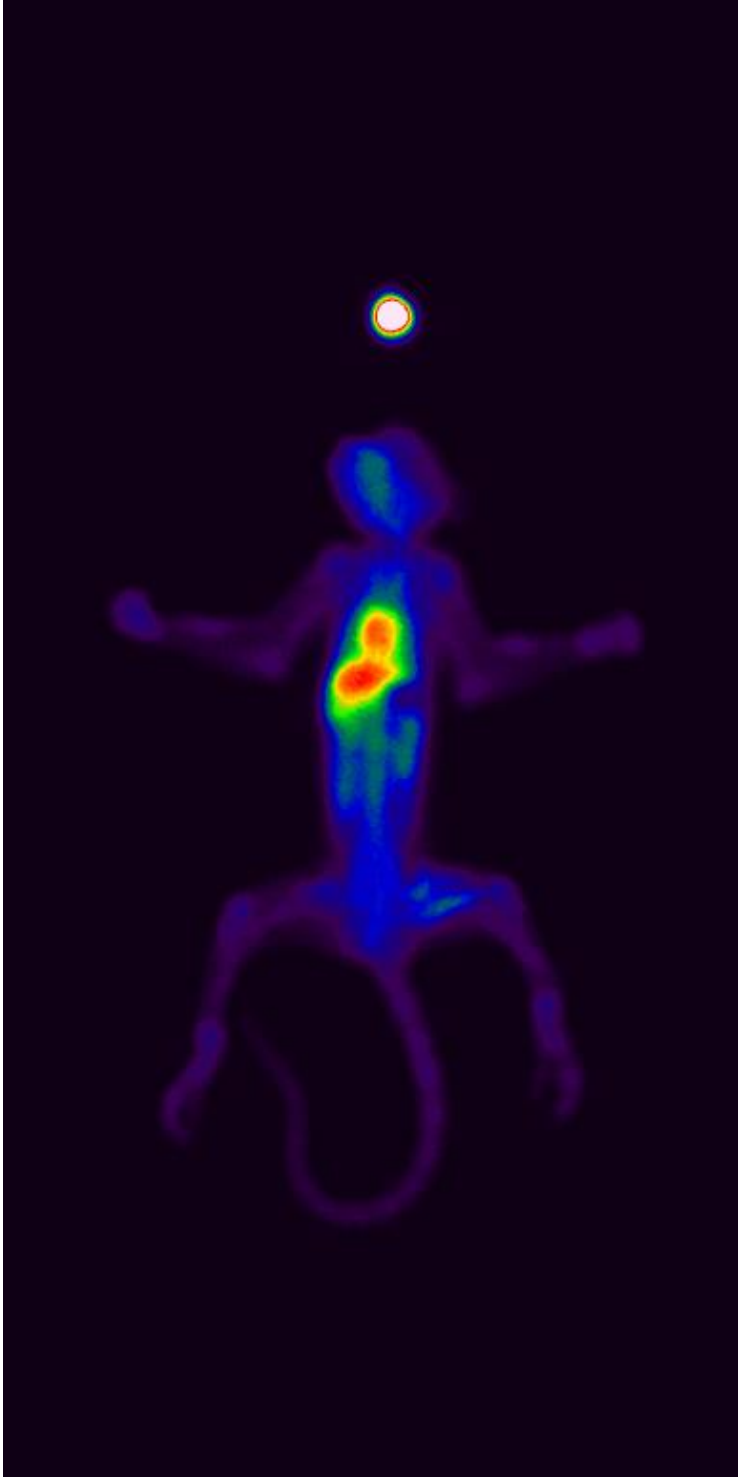

### Reference for Supplemental Information

1. Du Bois D, Du Bois EF. A formula to estimate the approximate surface area if height and weight be known. 1916. *Nutrition*. 1989;5:303-311; discussion 312-303.
2. Protection ICoR. Basic Anatomical and Physiological Data for Use in Radiological Protection Reference Values. *ICRP Publication 89*. 2002;32:5-265.
3. Feldschuh J, Enson Y. Prediction of the normal blood volume. Relation of blood volume to body habitus. *Circulation*. 1977;56:605-612.
4. Nair AB, Jacob S. A simple practice guide for dose conversion between animals and human. *J Basic Clin Pharm*. 2016;7:27-31.
5. Wiseman GA, White CA, Sparks RB, et al. Biodistribution and dosimetry results from a phase III prospectively randomized controlled trial of Zevalin radioimmunotherapy for low-grade, follicular, or transformed B-cell non-Hodgkin's lymphoma. *Crit Rev Oncol Hematol*. 2001;39:181-194.
